# Supplementary material for: In situ-engineered coral-like multiphase NC@NiCoCu–N/NCF nanoarrays for enhanced hydrogen evolution reaction
Source: Royal Society of Chemistry journal article supplement (doi:10.1039/d3nj03909a), 2023-01-01
Supplement: d3nj03909a1.pdf [file d3nj03909a1.pdf]

## Supporting Information

### **In-situ-engineered coral-like multiphase NC@NiCoCu-N/NCF nanoarrays for enhanced hydrogen evolution reaction**

Yaoxia Yang<sup>\*,§</sup>, Lan Zhang<sup>§</sup>, Fengyao Guo, Dangxia Wang, Xingwei Guo,  
Wei Zeng, and Dongfei Sun

Key Laboratory of Eco-functional Polymer Materials of the Ministry of Education,

Key Laboratory of Eco-environmental Polymer Materials of Gansu Province,

College of Chemistry and Chemical Engineering, Northwest Normal University,

Lanzhou 730070, China

---

\*Corresponding author.

*E-mail address:* yangyaoxia2007@126.com; yaoxiayang@nwnu.edu.cn (Y-X, Yang).

## **Experimental Section**

### *Sample Characterization*

The physico-chemical structures of the catalysts are investigated with following instruments. The components and morphologies of samples were characterized by using transmission electron microscopy (TEM, FEI TECNAI G<sup>2</sup> F<sub>20</sub>, America) and field-emission scanning electron microscopy (FE-SEM, Carl Zeiss Ultra Plus, Germany). The elemental mappings and chemical compositions of the samples were characterized via energy-dispersive X-ray spectroscopy (EDX, Oxford, England) equipped with an Aztec-X-80. The crystalline phases and chemical states of resulting were analyzed with an X-ray powder diffraction (XRD, Rigaku D/Max-2400) using a Cu K $\alpha$  radiation source and X-ray photoelectron spectrometer (XPS, Thermo ESCALAB 250XI) equipped a Al K $\alpha$  radiation source. Raman spectroscopy (Renishaw invia, England) was used to characterize the structure of carbon materials in the samples.

### *Electrochemical measurements*

All electrochemical measurements are made using Autolab PGSTAT128N (Switzerland) Electrochemical workstation. In a standard three-electrode system, the prepared sample was used as the self-supported working electrode, the graphite electrode as the counter electrode, and the Ag/AgCl and Hg/HgO electrodes as the reference electrodes in 0.5 M H<sub>2</sub>SO<sub>4</sub> and 1M KOH solutions, respectively. Linear sweep voltammetry (LSV) curve scanning speed is 5 mV s<sup>-1</sup>, and all datas are not compensated by iR. The Tafel plot of the linear region is obtained by fitting the Tafel

equation ( $\eta = a + b \log j$ ), where  $\eta$  is overpotential,  $b$  is Tafel slope, and  $j$  is current density. Since  $\text{ECSA} = C_{\text{dl}}/C_s$ , Electrochemically active surface area (ECSA) is linearly dependent on double-layer capacitance ( $C_{\text{dl}}$ ), ECSA could be assessed by  $C_{\text{dl}}$  that was obtained from CV cycle curves at 20-100  $\text{mV s}^{-1}$  sweep velocities in 1 M KOH and 80-240  $\text{mV s}^{-1}$  sweep velocities in 0.5 M  $\text{H}_2\text{SO}_4$  at nonfaradaic potential range without polarization current. By plotting the current density variation ( $\Delta j = (j_a - j_c)/2$ ) at -0.80 V (vs. RHE) in 1 M KOH and 0.05 V (vs. RHE) in 0.5 M  $\text{H}_2\text{SO}_4$  with scan rates from CV curves, a slope of the fitting line was observed as  $C_{\text{dl}}$ , Electrochemical impedance spectroscopy (EIS) measurements were recorded in the frequency range of 0.01 Hz to 100 kHz with an applied potential of  $\eta_{10}$  and a voltage amplitude of 5 mV. The stability of the catalyst was evaluated by using chronopotentiometric method for 48 h under current densities of  $10 \text{ mA}\cdot\text{cm}^{-2}$  and  $50 \text{ mA}\cdot\text{cm}^{-2}$ .

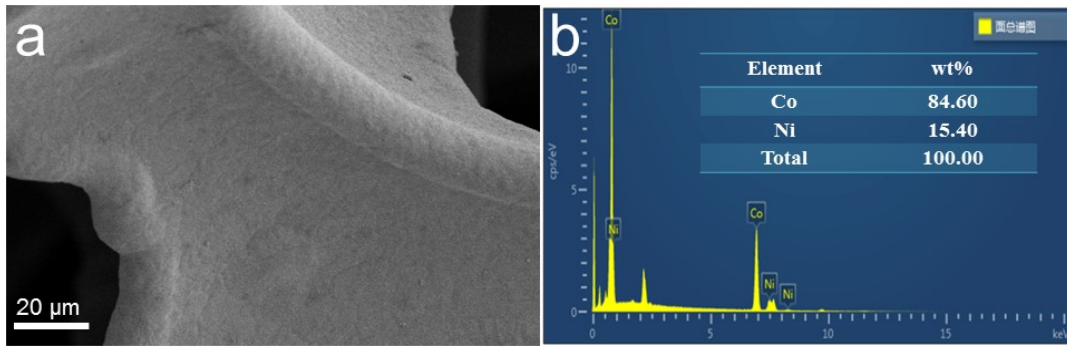

**Fig. S1** (a) SEM image of NCF, (b) The EDX spectrum of NCF and corresponding element ratios.

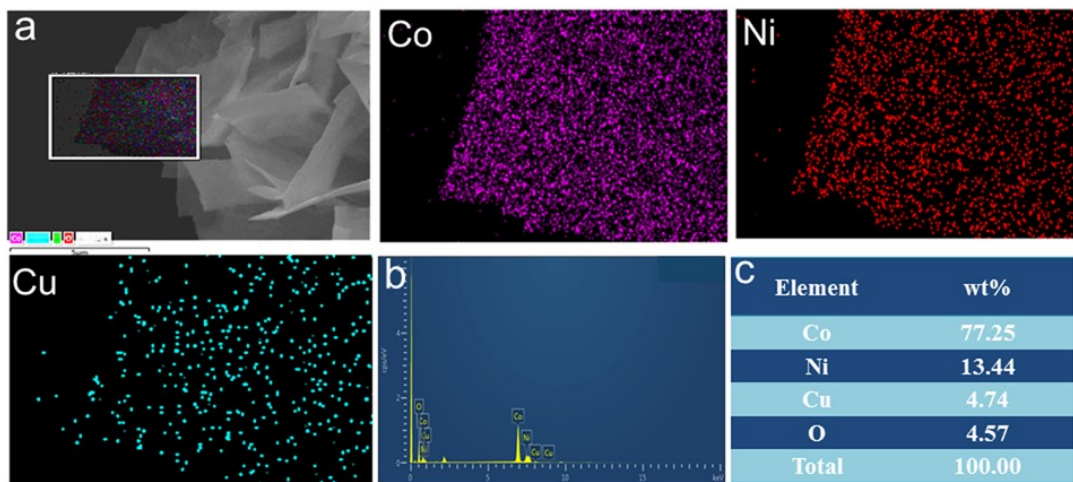

**Fig. S2** (a) SEM image and EDX elemental mapping of Co, Ni, Cu and N for Cu/NCF sample, (b) the EDX spectrum of Cu/NCF and corresponding element ratios.

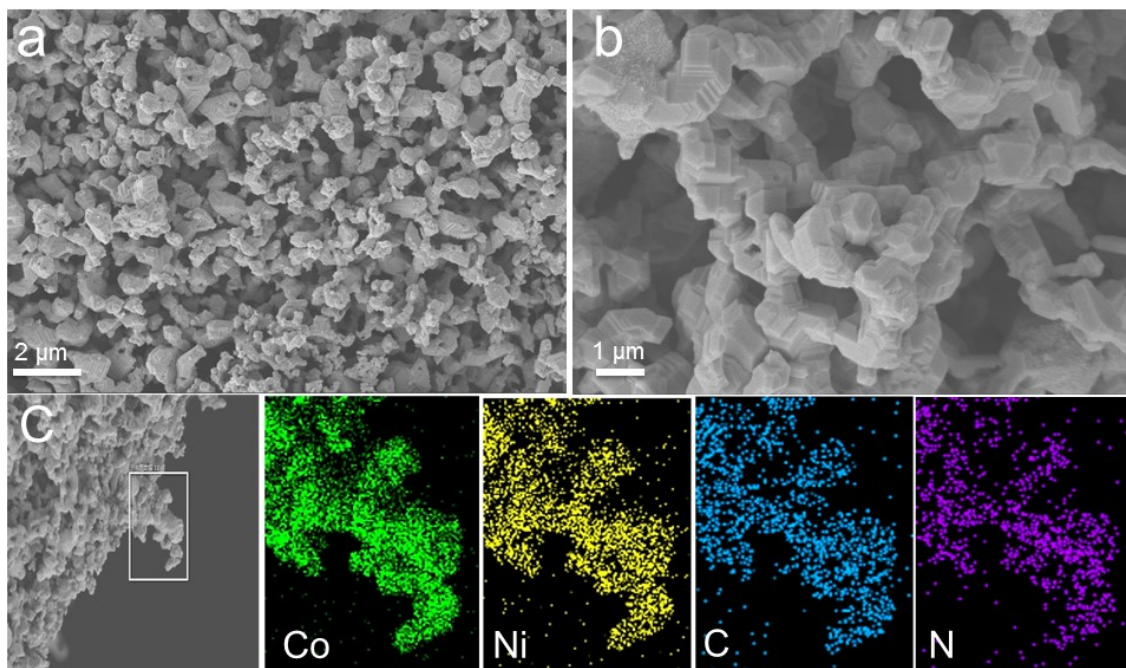

**Fig. S3** (a, b) different-resolution SEM images of NiCo-N/NCF, (c) SEM image and EDX elemental mapping of Co, Ni, C and N for NiCo-N/NCF.

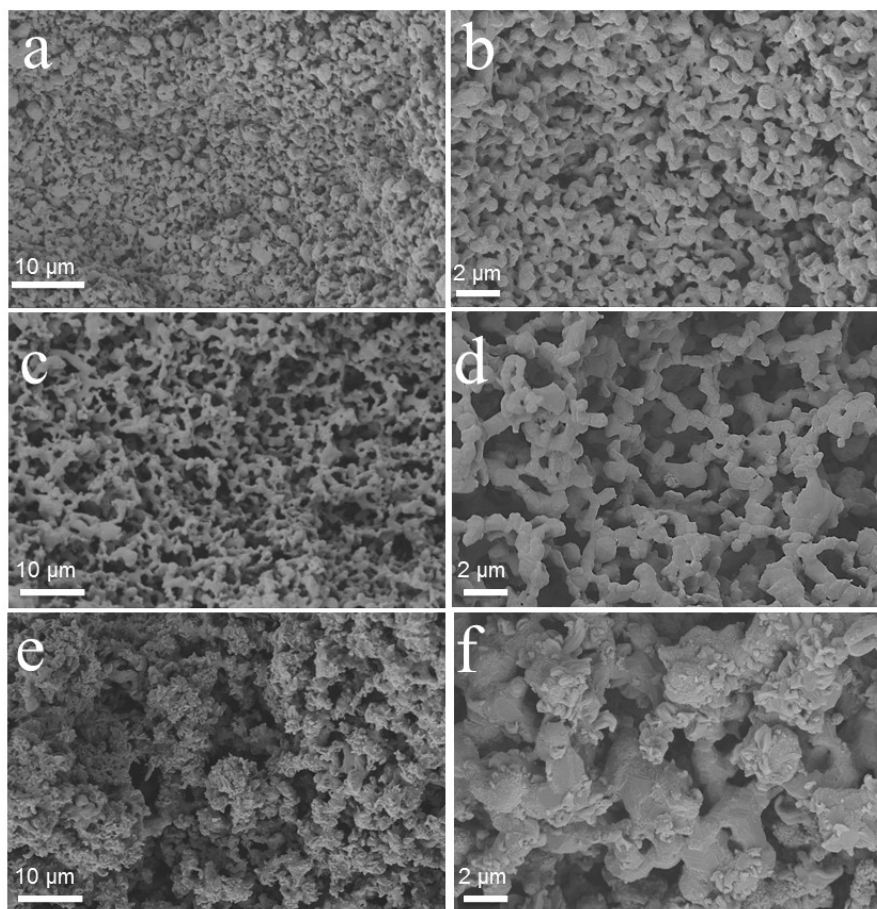

**Fig. S4** different-resolution SEM images of samples prepared with (a, b) 0.4 g, (c, d) 0.5 g and (e, f) 0.6 g dicyandiamide in the nitriding process.

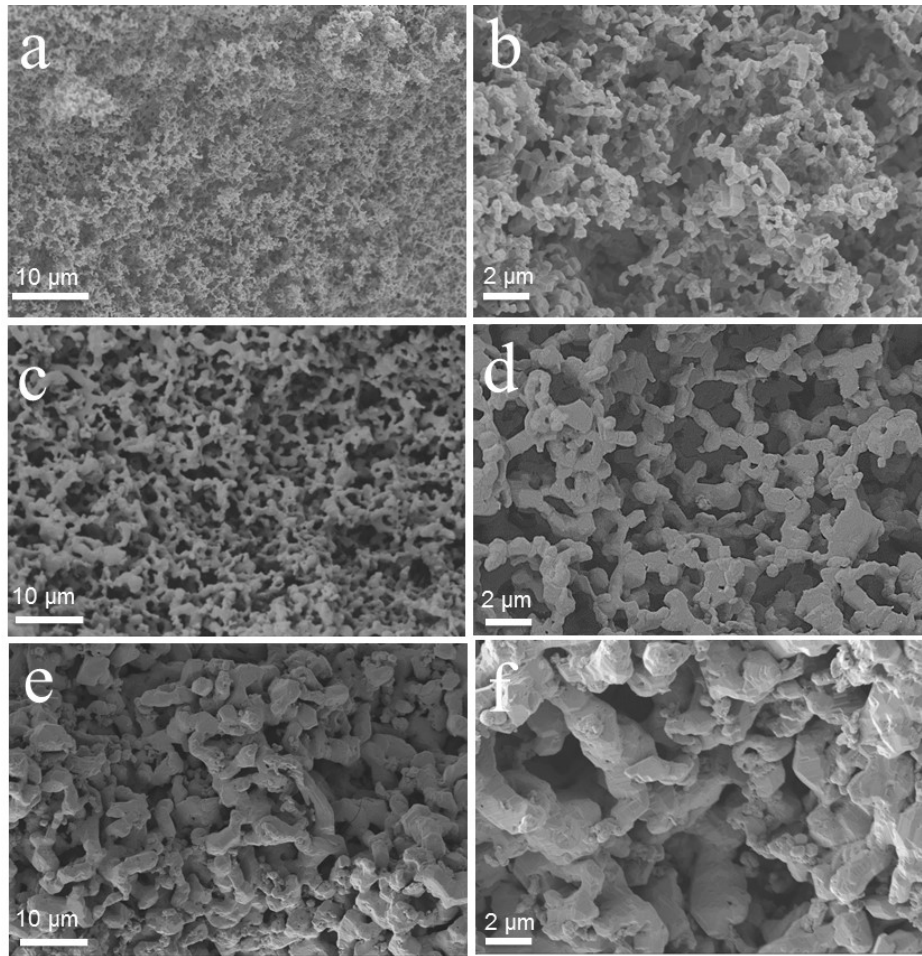

**Fig. S5** different-resolution SEM images of samples prepared with (a, b) 600 °C, (c, d) 700 °C and (e, f) 800 °C temperature in the nitriding process.

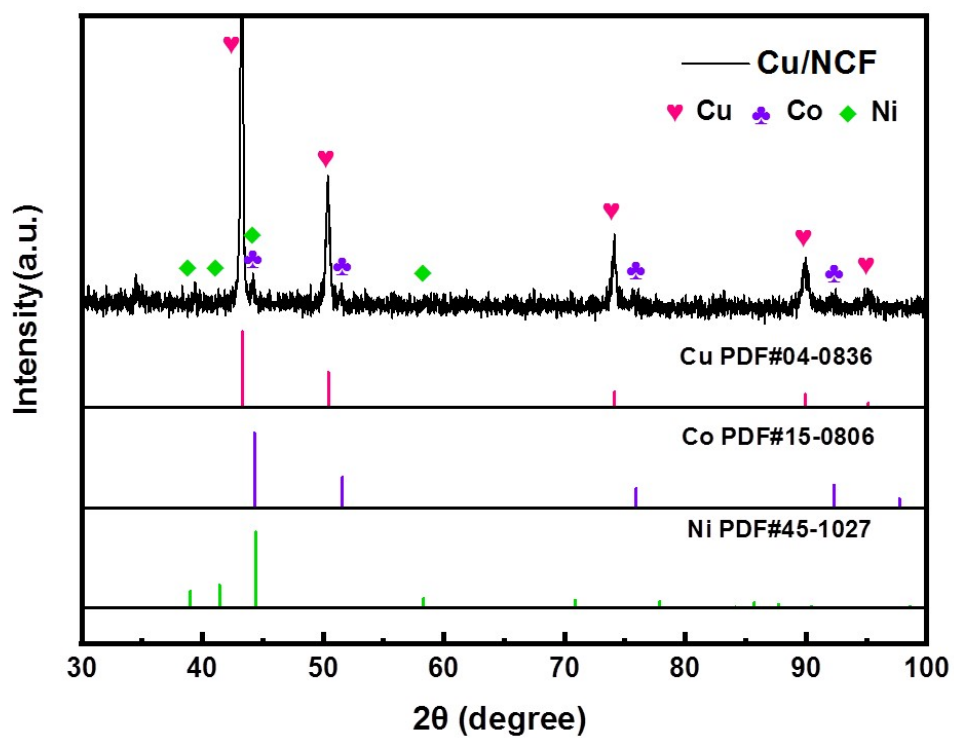

Fig. S6 The XRD patterns of Cu/NCF sample.

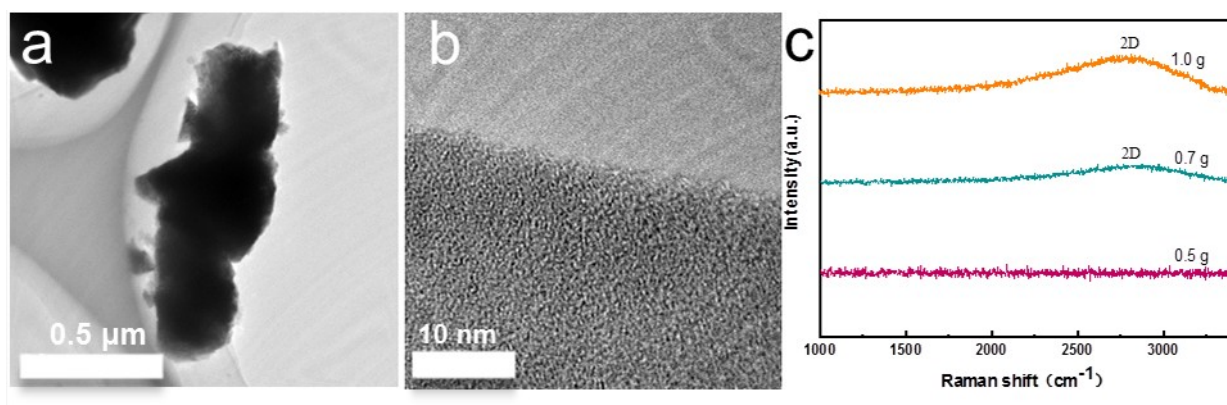

Fig. S7 (a) TEM image and (b) HR-TEM image of NC@NiCuCo-N/NCF, (c) Raman spectra of

NC@NiCuCo-N/NCF used 0.5 g, 0.7 g and 1.0 g dicyandiamide, respectively.



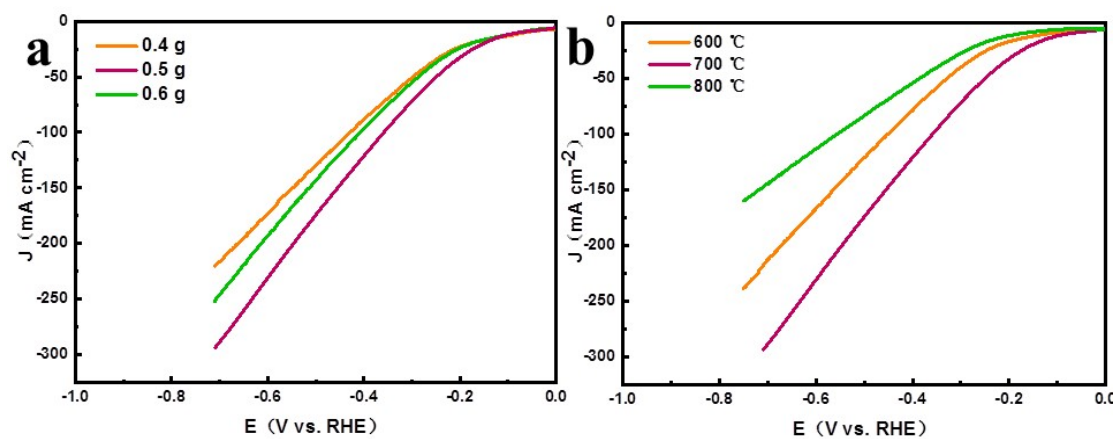

**Fig. S8** (a) LSV curves of samples prepared with 0.4 g, 0.5 g, 0.6 g dicyandiamide and (b) LSV curves of samples prepared with (a, b) 600 °C, (c, d) 700 °C and (e, f) 800 °C temperature in the nitriding process.

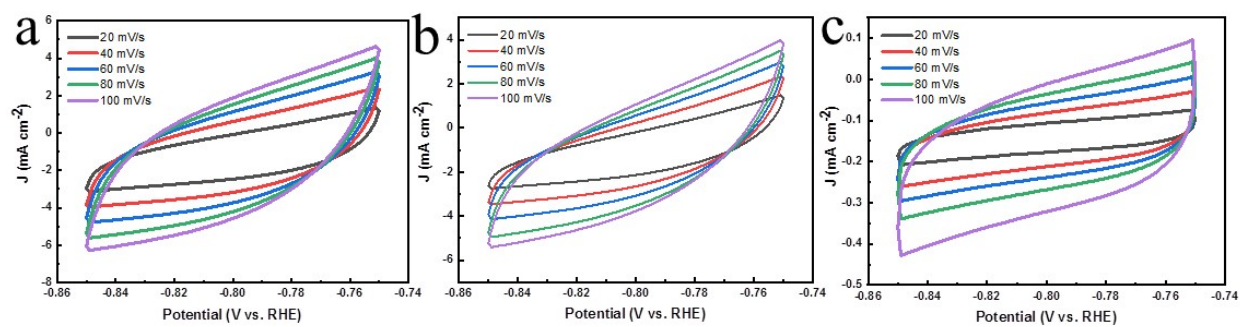

**Fig. S9** CV curves in the non-faradaic capacitance current range at different scan rates for

(a) NiCoCu-N/NCF, (b) Cu/NCF, (c) NCF in 1M KOH electrolyte.

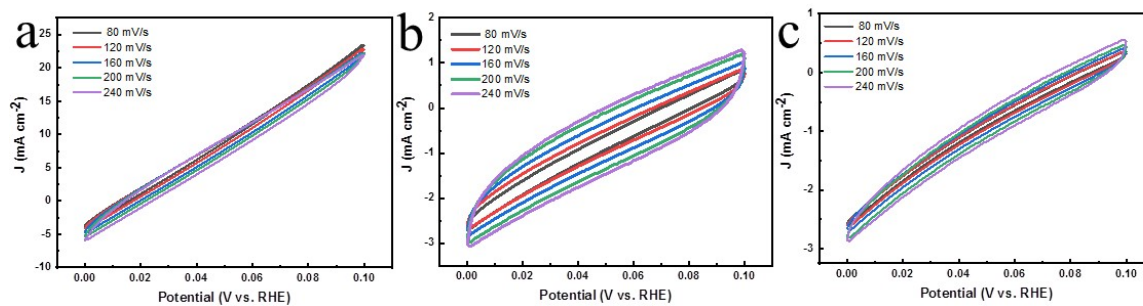

**Fig. S10** CV curves in the non-faradaic capacitance current range at different scan rates for

(a) NiCoCu-N/NCF, (b) Cu/NCF, (c) NCF in 0.5 M H<sub>2</sub>SO<sub>4</sub> electrolyte.

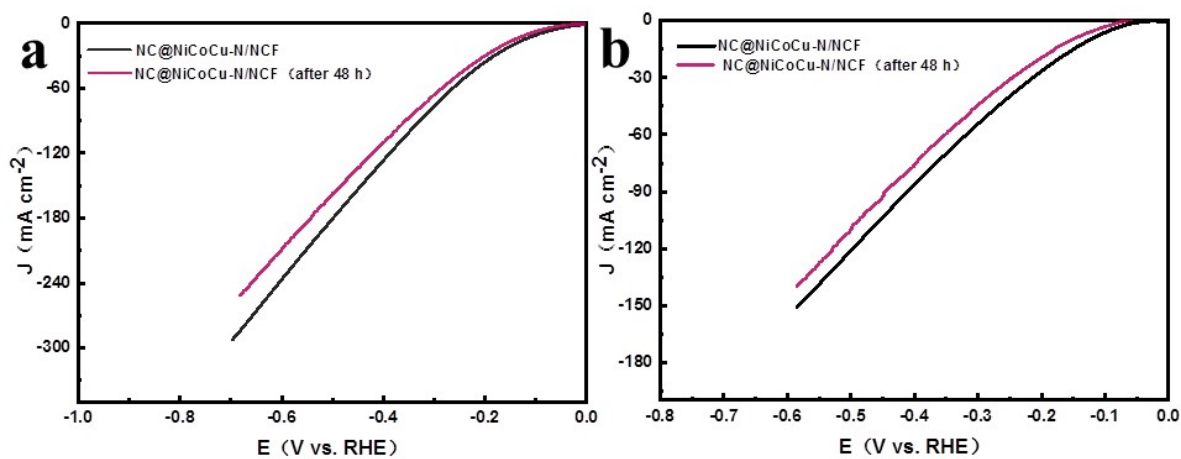

**Fig. S11** LSV curves of NC@NiCuCo-N/NCF before and after stability test (a) in 1 M KOH and (b) in 0.5 M H<sub>2</sub>SO<sub>4</sub>.

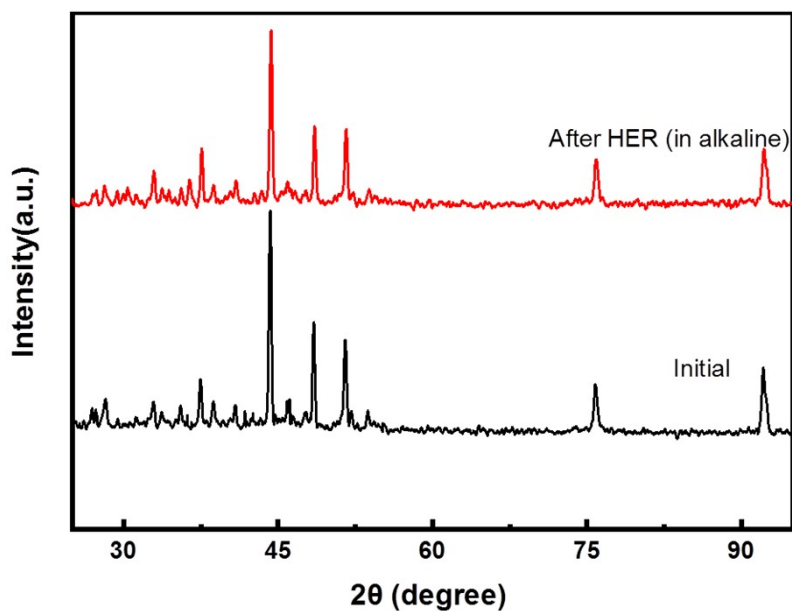

**Fig. S12** (a) XRD comparison of NC@NiCuCo-N/NCF before and after stability test In 1 M KOH.

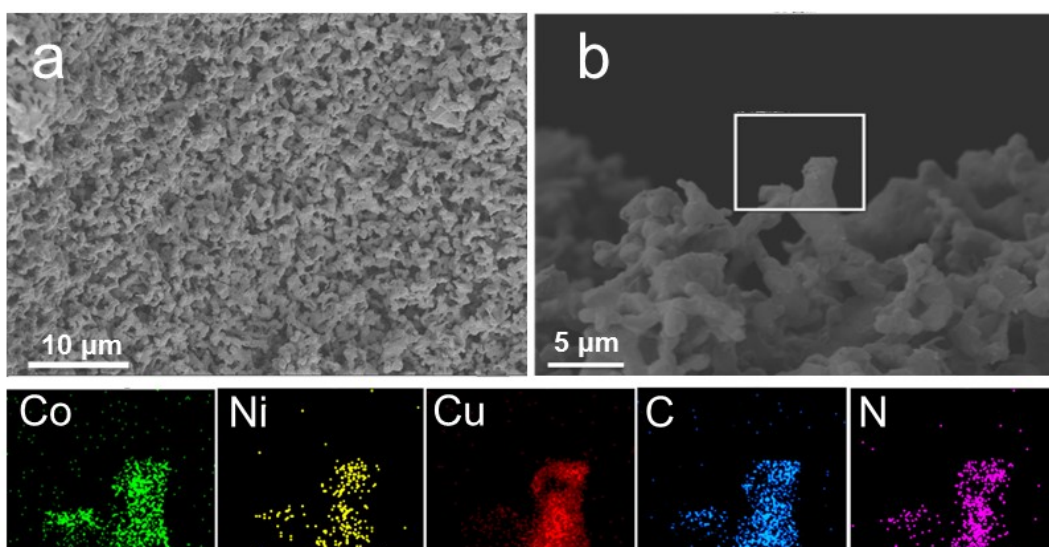

**Fig. S13** (a) SEM image of NC@NiCuCo-N/NCF, (b) SEM image and EDX elemental mapping of Co, Ni, Cu, C, N after chronopotentiometric test in 1 M KOH.

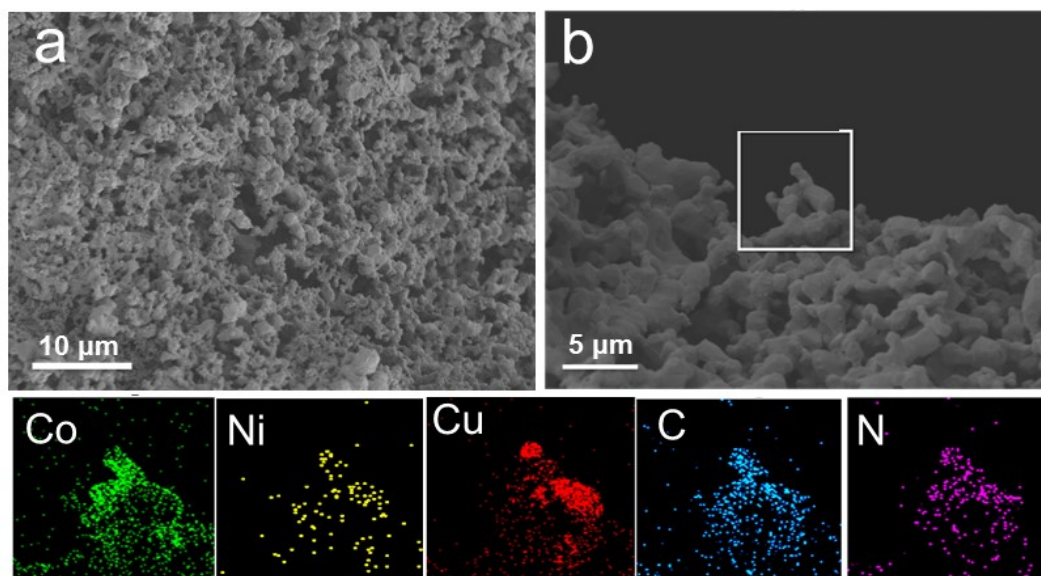

**Fig. S14** (a) SEM image of NC@NiCuCo-N/NCF, (b) SEM image and EDX elemental mapping of Co, Ni, Cu, C, N after chronopotentiometric test in 0.5 M H<sub>2</sub>SO<sub>4</sub>.

Table S1 Comparison of HER performance of NC@NiCoCu-N/NCF with other advanced electrocatalysts in alkaline media.

| Catalysts                                         | $\eta_{10}$ (mV) | Tafel slope (mV dec <sup>-1</sup> ) | References |
|---------------------------------------------------|------------------|-------------------------------------|------------|
| NC@NiCoCu-N/NCF                                   | 89               | 96                                  | This work  |
| Co/CoMoN/NF                                       | 61               | 68.9                                | [S1]       |
| Cu/NiO/Cu <sub>2</sub> O@NCF                      | 79               | 60                                  | [S2]       |
| Co <sub>3</sub> O <sub>4</sub> -Co <sub>4</sub> N | 90               | 57.8                                | [S3]       |
| Fe-Cu@CN3                                         | 91               | 117                                 | [S4]       |
| Ni/Mo <sub>6</sub> Ni <sub>6</sub> C@C            | 101              | 147                                 | [S5]       |
| Ni(OH) <sub>2</sub> @Ni-N/Ni-C                    | 102              | 43.9                                | [S6]       |
| Co-N/CNT/C-850                                    | 120              |                                     | [S7]       |
| NC@CoN/Cu <sub>3</sub> N/CF                       | 134              | 99.2                                | [S8]       |
| Co-NCNTFs//NF                                     | 141              | /                                   | [S9]       |
| Co-NCNT/NF                                        | 157              | 88                                  | [S10]      |
| Ni-N-C/Ni@CNT-H                                   | 175              | /                                   | [S11]      |
| Co@NMPC                                           | 193              | 64                                  | [S12]      |
| Co-Ni <sub>3</sub> N                              | 194              | 156                                 | [S13]      |
| NiSe <sub>2</sub> /Ni-N-CNT                       | 220              | 63                                  | [S14]      |

Table S2 HER parameters of various as-prepared catalysts in 1 M KOH.

| <b>Catalyst</b> | <b><math>\eta_{10}</math> (mV)</b> | <b>Tafel slope<br/>(mV dec<sup>-1</sup>)</b> | <b><math>C_{dl}</math> (mF cm<sup>-2</sup>)</b> | <b><math>R_{ct}</math> (<math>\Omega</math>)</b> |
|-----------------|------------------------------------|----------------------------------------------|-------------------------------------------------|--------------------------------------------------|
| NC@NiCuCo-N/NCF | 89                                 | 96                                           | 31                                              | 2.25                                             |
| NiCo-N/NCF      | 134                                | 138                                          | 25                                              | 2.59                                             |
| Cu/NCF          | 182                                | 207                                          | 18                                              | 3.23                                             |
| NCF             | 298                                | 227                                          | 1.5                                             | 4.21                                             |

Table S3 HER parameters of various as-prepared catalysts in 0.5 M H<sub>2</sub>SO<sub>4</sub>.

| <b>Catalyst</b> | <b><math>\eta_{10}</math> (mV)</b> | <b>Tafel slope<br/>(mV dec<sup>-1</sup>)</b> | <b>C<sub>dl</sub> (mF cm<sup>-2</sup>)</b> | <b>R<sub>ct</sub> (<math>\Omega</math>)</b> |
|-----------------|------------------------------------|----------------------------------------------|--------------------------------------------|---------------------------------------------|
| NC@NiCuCo-N/NCF | 131                                | 106                                          | 15                                         | 1.3                                         |
| NiCo-N/NCF      | 182                                | 169                                          | 7.3                                        | 1.8                                         |
| Cu/NCF          | 221                                | 234                                          | 3.8                                        | 4.2                                         |
| NCF             | 365                                | 269                                          | 1.3                                        | 5.7                                         |

## Reference

- [S1] H.B. Ma, Z.W. Chen, Z.L. Wang, C.V. Singh, Q. Jiang, *Adv. sci.*, 2022, 9, 2105313.
- [S2] J. Ren, Q. Wang, Q. Xiang, C.M. Yang, Y. Liang, J.H. Li, J.L. Liu, D. Qian, *Chem. Eng. Sci.*, 2023, 280,119026.
- [S3] B. Liu, J. Cheng, H.Q. Peng, D. Chen, X. Cui, D. Shen, K. Zhang, T. Jiao, M. Li, C.S. Lee, W. Zhang, *J. Mater. Chem. A*, 2019, 7, 775-782.
- [S4] Q.F. He, H.Q. Liu, P.F. Tan, J.P. Xie, S.H. Si, J. Pan, *J. Solid State Chem.*, 2021, 299, 122179.
- [S5] Q.Q. Pan, C.Y. Xu, X. Li, J.F. Zhang, X.L. Hu, Y. Geng, Z.M. Su, *Chem. Eng. J.*, 2021, 405, 126962.
- [S6] K. Dastafkan, X.J. Shen, R.K. Hocking, Q. Meyer, C. Zhao, *Nat. Commun.*, 2023, 14, 547.
- [S7] Y.K. Fan, W.M. Duan, K. Xu, C.Z. Yan, C.C. Zheng, *ACS Appl. Nano Mater.* 2023, 6, 7920-7930.
- [S8] J.L. Li, X.G. Kong, M.H. Jiang, X.D. Lei, *Inorg. Chem. Front.*, 2018, 8, 2906-2913.
- [S9] Q.Y. Yuan, Y.X. Yu, Y.J. Gong, X.F. Bi, *ACS Appl. Mater. Interfaces*, 2020, 12, 3592-3602.
- [S10] R.J. Wang, L.J. Jiang, Q.L. Wang, G.F. Wei, X.F. Wang, *Adv. Compos. Hybrid Ma.*, 2023, 6, 157.
- [S11] L.L. Feng, C.L. Fu, D.M. Li, X. Ai, H.Y. Yin, Y.H. Li, X.Y. Li, L.Y. Cao, J.F.



Huang, Dalton Trans., 2023, 52, 9684-9693.

[S12] R. Jiang, Q. Li, X. Zheng, W.Z. Wang, W. Liu, S.B. Wang, Z.M. Xu, J. Peng, Int. J. Hydrogen Energ., 2022, 47, 27374-27382.

[S13] C.R. Zhu, A.L. Wang, W. Xiao, D.L. Chao, X. Zhang, N.H. Tiep, S. Chen, J.N. Kang, X. Wang, J. Ding, J. Wang, H. Zhang, H.J. Fan, Adv. Mater., 2018, 30, 1705516.

[S14] C.J. Wang, X. Zhang, Y.N. Zhu, K.L. Zhu, X.X. Luan, P. Yang, Electrochim. Acta, 2023, 454, 142386.
